# Supplementary material for: Reactivity and selectivity of the reaction of O,O-diethyl 2,4-dinitrophenyl phosphate and thionophosphate with thiols of low molecular weight
Source: Royal Society of Chemistry journal article supplement (doi:10.1039/c6ob00918b), 2016-01-01
Supplement: c6ob00918b1.pdf [file c6ob00918b1.pdf]

**REACTIVITY AND SELECTIVITY OF THE REACTION OF *o,o*-DIETHYL  
2,4-DINITROPHENYL PHOSPHATE AND THIONOPHOSPHATE WITH  
THIOLS OF LOW MOLECULAR WEIGHT**

J. G. Santos, M. E. Aliaga, K. Alarcón, A. Torres, D. Céspedes and P.  
Pavez.\*

Facultad de Química. Pontificia Universidad Católica de Chile. Casilla  
306, Santiago 6094411, Chile.

Author Information

\*Corresponding author. Tel.: +56-223541743; fax: +56-226864744; e-  
mail: ppavezg@uc.cl

Present address: Facultad de Química, Pontificia Universidad Católica de  
Chile, Av. Vicuña Mackenna 4860, Santiago 6094411, Chile.

| <b>Table of contents</b>                                                                                                                                                                                             | <b>Page</b> |
|----------------------------------------------------------------------------------------------------------------------------------------------------------------------------------------------------------------------|-------------|
| <b>Figure S1:</b> Sequence of $^{31}\text{P}$ NMR spectra for the reaction of <i>O,O</i> -diethyl 2,4-dinitrophenyl phosphate ( <b>1</b> ) with N-acetyl cysteine in $\text{D}_2\text{O}$ - Acetonitrile 60:40 %v/v. | S4          |
| <b>Figure S2:</b> Sequence of $^{31}\text{P}$ NMR spectra for the reaction of <i>O,O</i> -diethyl 2,4-dinitrophenyl phosphate ( <b>1</b> ) with L-cysteine in $\text{D}_2\text{O}$ - Acetonitrile 60:40 %v/v.        | S5          |
| <b>Figure S3:</b> Sequence of $^{31}\text{P}$ NMR spectra for the reaction of <i>O,O</i> -diethyl 2,4-dinitrophenyl phosphate ( <b>1</b> ) with Homocysteine in $\text{D}_2\text{O}$ - Acetonitrile 60:40 %v/v.      | S6          |
| <b>Figure S4:</b> Sequence of $^{31}\text{P}$ NMR spectra for the reaction of <i>O,O</i> -diethyl 2,4-dinitrophenyl phosphate ( <b>1</b> ) with Glutathione in $\text{D}_2\text{O}$ - Acetonitrile 60:40 %v/v.       | S7          |
| <b>Figure S5:</b> Sequence of $^{31}\text{P}$ NMR spectra for the reaction of <i>O,O</i> -diethyl 2,4-dinitrophenyl phosphate ( <b>1</b> ) with Penicillamine in $\text{D}_2\text{O}$ - Acetonitrile 60:40 %v/v.     | S8          |
| <b>Figure S6:</b> Sequence of $^{31}\text{P}$ NMR spectra for the reaction of <i>O,O</i> -diethyl 2,4-dinitrophenyl thionophosphate ( <b>2</b> ) with L-cysteine in $\text{D}_2\text{O}$ -Acetonitrile 60:40 %v/v.   | S9          |
| <b>Figure S7:</b> $^{31}\text{P}$ -NMR spectrum of compound <b>3</b> , obtained in the reaction of <i>O,O</i> -diethyl chlorophosphate with NaOH in $\text{D}_2\text{O}$ - Acetonitrile 60:40 %v/v.                  | S10         |
| <b>Figure S8:</b> $^{31}\text{P}$ -NMR spectrum of compound <b>4</b> , obtained in the reaction of <i>O,O</i> -diethyl chlorothionophosphate with NaOH in $\text{D}_2\text{O}$ - Acetonitrile 60:40 %v/v.            | S11         |
| <b>Figure S9:</b> $^1\text{H}$ NMR spectra for the reaction of 1-Chloro-2,4-dinitrobenzene with N-acetylcysteine in $\text{D}_2\text{O}$ - Acetonitrile 60:40 %v/v.                                                  | S12         |
| <b>Figure S10:</b> $^1\text{H}$ NMR spectra for the reaction of 1-Chloro-2,4-dinitrobenzene with Penicillamine in $\text{D}_2\text{O}$ - Acetonitrile 60:40 %v/v.                                                    | S13         |
| <b>Figure S11:</b> $^1\text{H}$ NMR spectrum of compound <b>8</b> formed in the reaction of <b>1</b> with L-Cys at very long time, in $\text{D}_2\text{O}$ - Acetonitrile 60:40 %v/v.                                | S14         |
| <b>Figure S12:</b> $^1\text{H}$ NMR spectrum of the mixture of compounds <b>7</b> and <b>8</b> formed during the reaction of <b>1</b> with L-Cys, in $\text{D}_2\text{O}$ - Acetonitrile 60:40 %v/v.                 | S15         |
| <b>Figure S13:</b> Sequence of $^1\text{H}$ NMR spectra for the reaction of <i>O,O</i> -diethyl 2,4-dinitrophenyl phosphate ( <b>1</b> ) with Homocysteine in $\text{D}_2\text{O}$ - Acetonitrile 60:40 %v/v.        | S16         |
| <b>Figure S14:</b> Sequence of $^1\text{H}$ NMR spectra for the reaction of <i>O,O</i> -diethyl 2,4-dinitrophenyl phosphate ( <b>1</b> ) with Glutathione in $\text{D}_2\text{O}$ - Acetonitrile 60:40 %v/v.         | S17         |
| <b>Table S1:</b> Chemical shifts of 1-Chloro-2,4-dinitrobenzene, 2,4-dinitrophenol, compounds <b>1</b> and <b>2</b> and those attributed to the compounds <b>3-8</b> .                                               | S18         |

|                                                                                                                                                                                                                                                                 |     |
|-----------------------------------------------------------------------------------------------------------------------------------------------------------------------------------------------------------------------------------------------------------------|-----|
| <b>Table S2:</b> Kinetics data for the <b>1</b> and <b>2</b> reactions with Cys 0.05M, $\mu = 0.2$ M(KCl) at $25 \pm 0.1^\circ\text{C}$ .                                                                                                                       | S19 |
| <b>Table S3:</b> Experimental conditions and $k_{\text{obs}}$ values for the reactions <i>O,O</i> -diethyl 2,4-dinitrophenyl phosphate ( <b>1</b> ) with N-acetylcysteine (NAC) in aqueous ethanol 44wt. % , $37.0^\circ\text{C}$ , $\mu = 0.2$ M in KCl.       | S20 |
| <b>Table S4:</b> Experimental conditions and $k_{\text{obs}}$ values for the reactions <i>O,O</i> -diethyl 2,4-dinitrophenyl phosphate ( <b>1</b> ) with L-Cysteine (Cys) in aqueous ethanol 44wt. % , $37.0^\circ\text{C}$ , $\mu = 0.2$ M in KCl.             | S20 |
| <b>Table S5:</b> Experimental conditions and $k_{\text{obs}}$ values for the reactions <i>O,O</i> -diethyl 2,4-dinitrophenyl phosphate ( <b>1</b> ) with Homocysteine (Hcys) in aqueous ethanol 44wt. % , $37.0^\circ\text{C}$ , $\mu = 0.2$ M in KCl.          | S21 |
| <b>Table S6:</b> Experimental conditions and $k_{\text{obs}}$ values for the reactions <i>O,O</i> -diethyl 2,4-dinitrophenyl phosphate ( <b>1</b> ) with Glutathione (GSH) in aqueous ethanol 44wt. % , $37.0^\circ\text{C}$ , $\mu = 0.2$ M in KCl.            | S21 |
| <b>Table S7:</b> Experimental conditions and $k_{\text{obs}}$ values for the reactions <i>O,O</i> -diethyl 2,4-dinitrophenyl phosphate ( <b>1</b> ) with D-Penicillamine (Pen) in aqueous ethanol 44wt. % , $37.0^\circ\text{C}$ , $\mu = 0.2$ M in KCl.        | S22 |
| <b>Table S8:</b> Experimental conditions and $k_{\text{obs}}$ values for the reactions <i>O,O</i> -diethyl 2,4-dinitrophenyl thionohosphate ( <b>2</b> ) with L-Cysteine (Cys) in aqueous ethanol 44wt. % , $37.0^\circ\text{C}$ , $\mu = 0.2$ M in KCl.        | S22 |
| <b>Table S9:</b> Experimental conditions and $k_{\text{obs}}$ values for the reactions <i>O,O</i> -diethyl 2,4-dinitrophenyl thionohosphate ( <b>2</b> ) with Glutathione (GSH) in aqueous ethanol 44wt. % , $37.0^\circ\text{C}$ , $\mu = 0.2$ M in KCl.       | S23 |
| <b>Table S10:</b> Experimental conditions and $k_{\text{obs}}$ values for the reactions <i>O,O</i> -diethyl 2,4-dinitrophenyl thionohosphate ( <b>2</b> ) with Homocysteine (Hcys) in aqueous ethanol 44wt. % , $37.0^\circ\text{C}$ , $\mu = 0.2$ M in KCl.    | S23 |
| <b>Table S11:</b> Experimental conditions and $k_{\text{obs}}$ values for the reactions <i>O,O</i> -diethyl 2,4-dinitrophenyl thionohosphate ( <b>2</b> ) with N-acetylcysteine (NAC) in aqueous ethanol 44wt. % . $37.0^\circ\text{C}$ . $\mu = 0.2$ M in KCl. | S24 |
| <b>Table S12:</b> Experimental conditions and zero-order $k_{\text{obs}}$ values for the reaction <i>O,O</i> -diethyl 2,4-dinitrophenyl phosphate ( <b>1</b> ) with L-Cysteine (Cys) in aqueous ethanol 44wt. % , $37.0^\circ\text{C}$ , $\mu = 0.2$ M in KCl   | S24 |

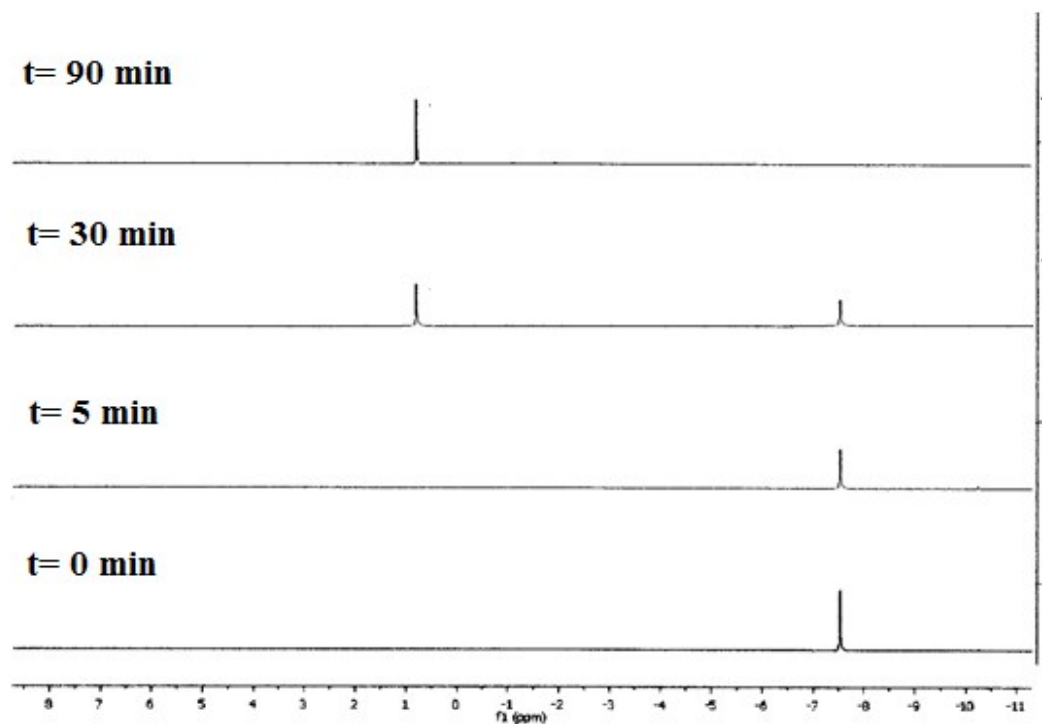

**Figure S1:** Sequence of  $^{31}\text{P}$  NMR spectra for the reaction of *O,O*-diethyl 2,4-dinitrophenyl phosphate (**1**) with N-acetyl cysteine in  $\text{D}_2\text{O}$ - Acetonitrile 60:40 %v/v, 0.1M in biothiol, 0.006M the substrate and  $\text{pH}=\text{p}K_a$  of corresponding thiol group

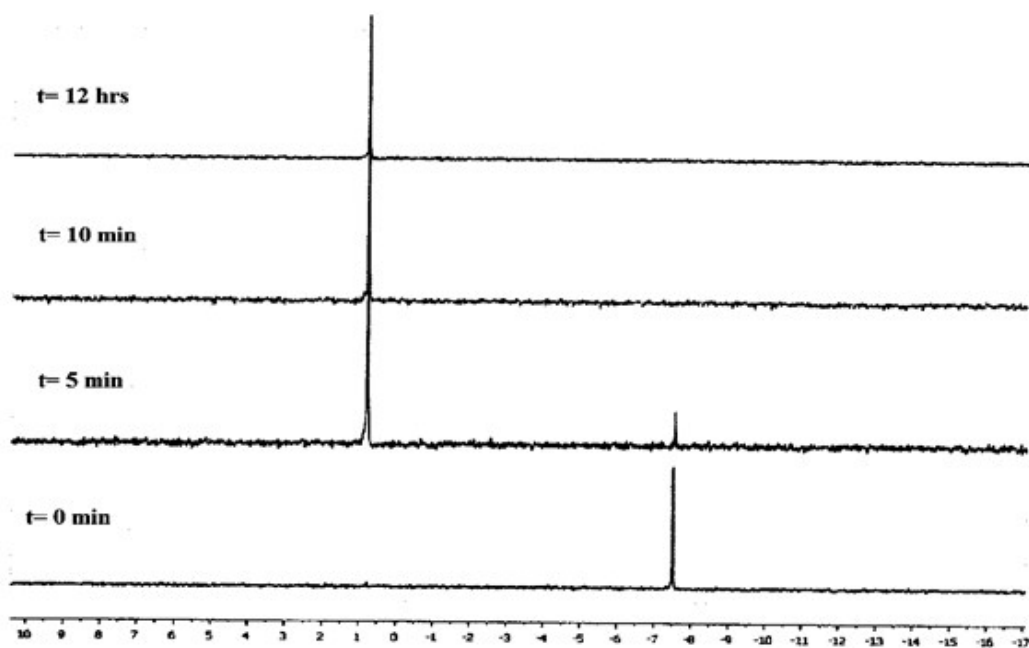

**Figure S2:** Sequence of  $^{31}\text{P}$  NMR spectra for the reaction of *O,O*-diethyl 2,4-dinitrophenyl phosphate (**1**) with L-cysteine in  $\text{D}_2\text{O}$ - Acetonitrile 60:40 %v/v, 0.1M in biothiol, 0.006M the substrate and  $\text{pH}=\text{p}K_a$  of corresponding thiol group

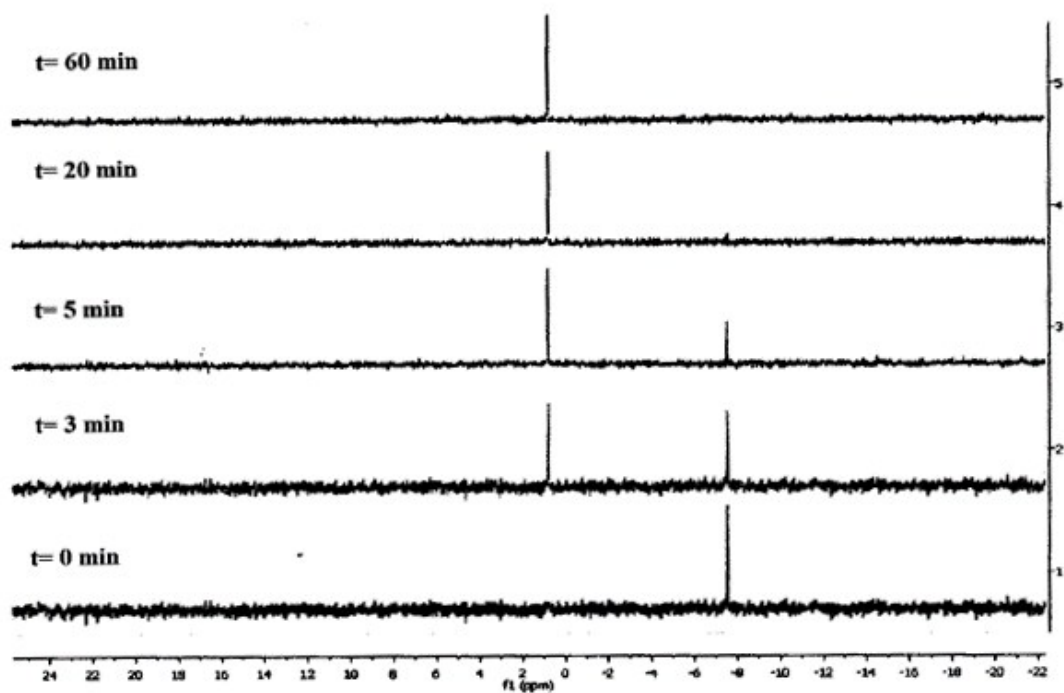

**Figure S3:** Sequence of  $^{31}\text{P}$  NMR spectra for the reaction of *O,O*-diethyl 2,4-dinitrophenyl phosphate (**1**) with Homocysteine in  $\text{D}_2\text{O}$ - Acetonitrile 60:40 %v/v, 0.1M in biothiol, 0.006M the substrate and  $\text{pH}=\text{p}K_a$  of corresponding thiol group.

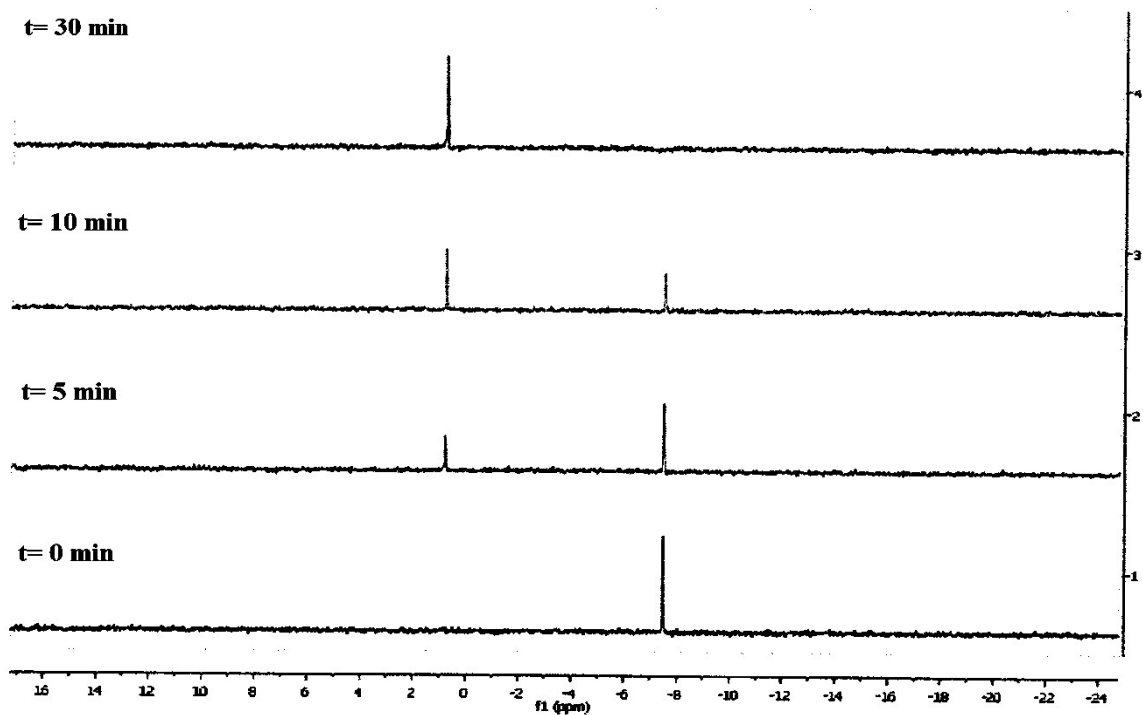

**Figure S4:** Sequence of  $^{31}\text{P}$  NMR spectra for the reaction of *O,O*-diethyl 2,4-dinitrophenyl phosphate (**1**) with Glutathione in  $\text{D}_2\text{O}$ - Acetonitrile 60:40 %v/v, 0.1M in biothiol, 0.006M the substrate and  $\text{pH}=\text{p}K_a$  of corresponding thiol group.

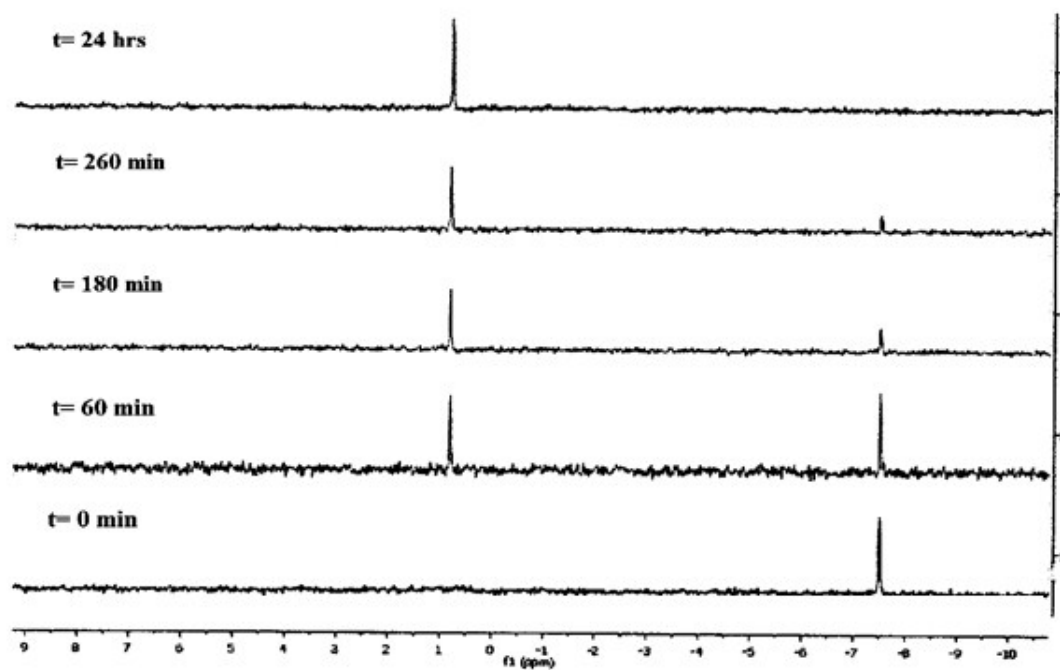

**Figure S5:** Sequence of  $^{31}\text{P}$  NMR spectra for the reaction of *O,O*-diethyl 2,4-dinitrophenyl phosphate (**1**) with Penicillamine in  $\text{D}_2\text{O}$ - Acetonitrile 60:40 %v/v, 0.1M in biothiol, 0.006M the substrate and  $\text{pH}=\text{p}K_a$  of corresponding thiol group.



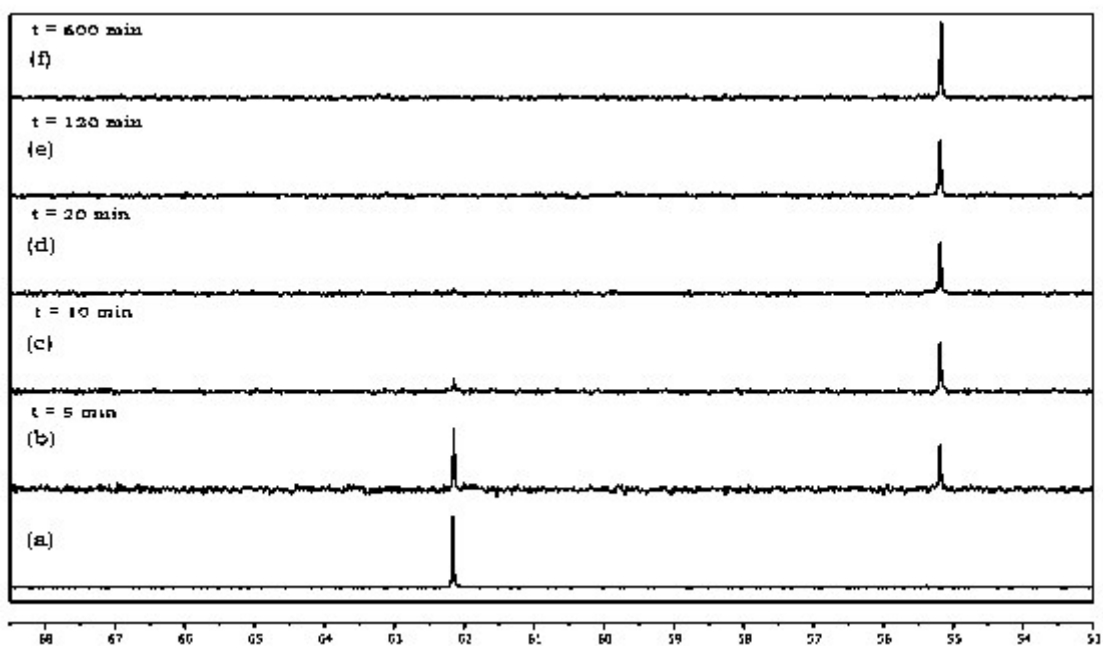

**Figure S6:** Sequence of  $^{31}\text{P}$  NMR spectra for the reaction of *O,O*-diethyl 2,4-dinitrophenyl thionophosphate (**2**) with L-cysteine in  $\text{D}_2\text{O}$ -Acetonitrile 60:40 %v/v, 0.1M in biethiol, 0.006M the substrate and  $\text{pH}=\text{p}K_a$  of corresponding thiol group.

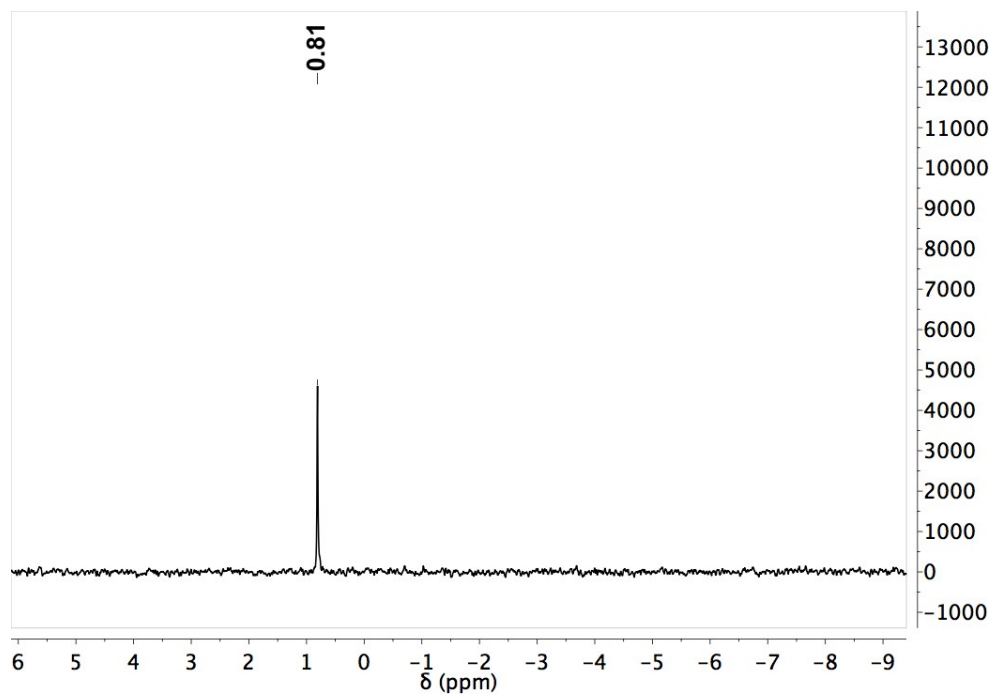

**Figure S7:**  $^{31}\text{P}$ -NMR spectrum (400MHz) of compound **3**, obtained in the reaction of *O,O*-diethyl chlorophosphate with NaOH in  $\text{D}_2\text{O}$ - Acetonitrile 60:40 %v/v.

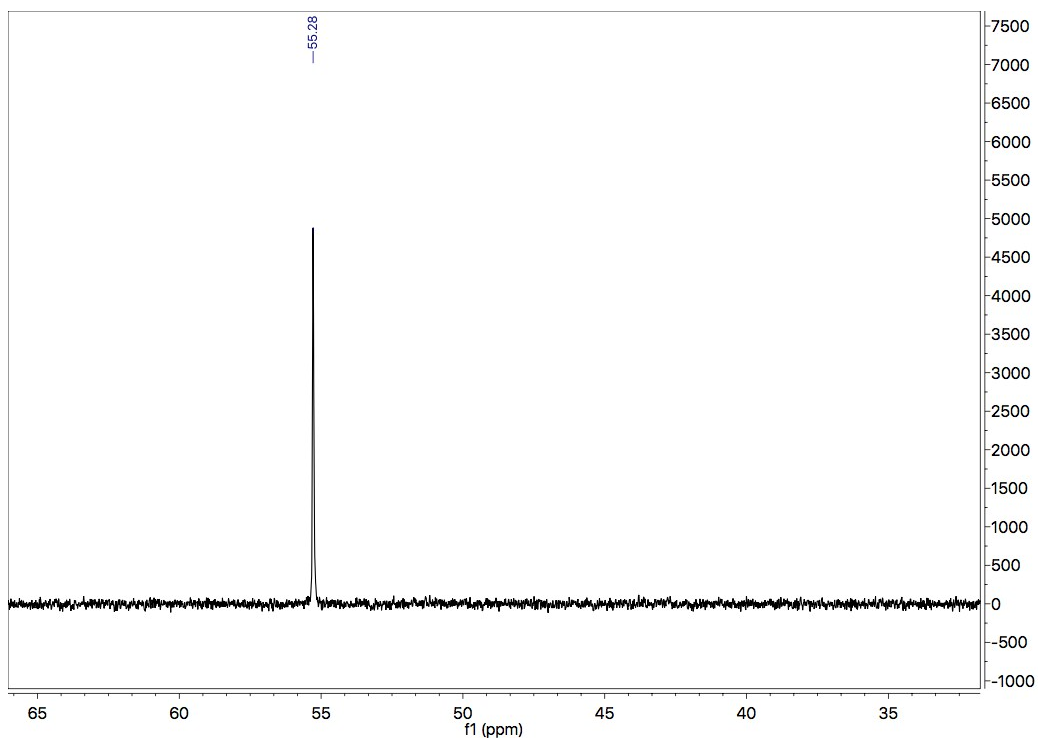

**Figure S8:**  $^{31}\text{P}$ -NMR spectrum (400MHz) of compound **4**, obtained in the reaction of *O,O*-diethyl chlorothionophosphate with NaOH in  $\text{D}_2\text{O}$ - Acetonitrile 60:40 %v/v.

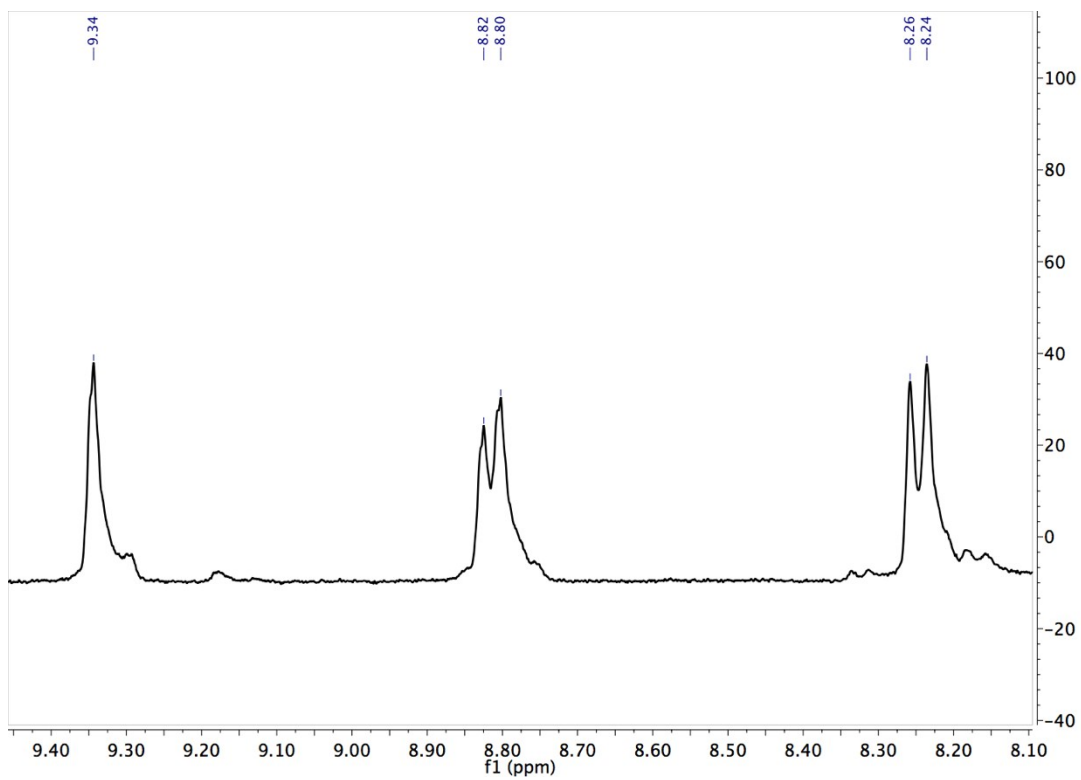

**Figure S9:** <sup>1</sup>H NMR spectra for the reaction of 1-Chloro-2,4-dinitrobenzene with N-acetylcysteine in D<sub>2</sub>O- Acetonitrile 60:40 %v/v.

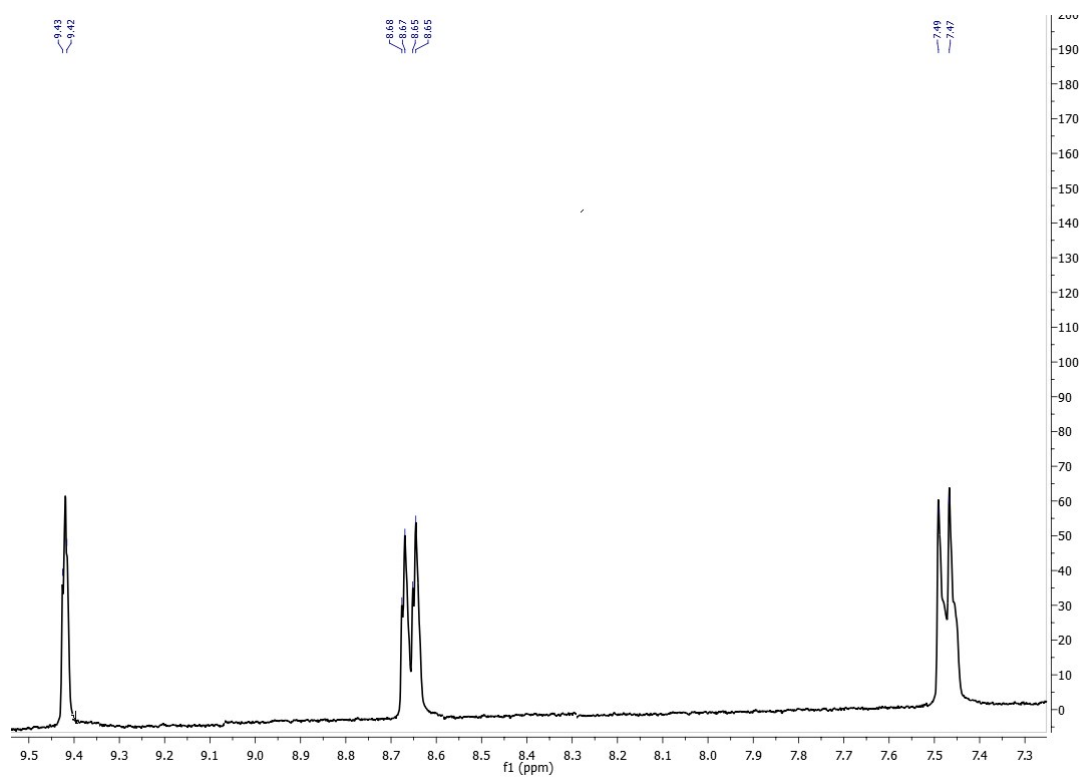

**Figure S10:** <sup>1</sup>H NMR spectra for the reaction of 1-Chloro-2,4-dinitrobenzene with Penicillamine in D<sub>2</sub>O- Acetonitrile 60:40 %v/v.

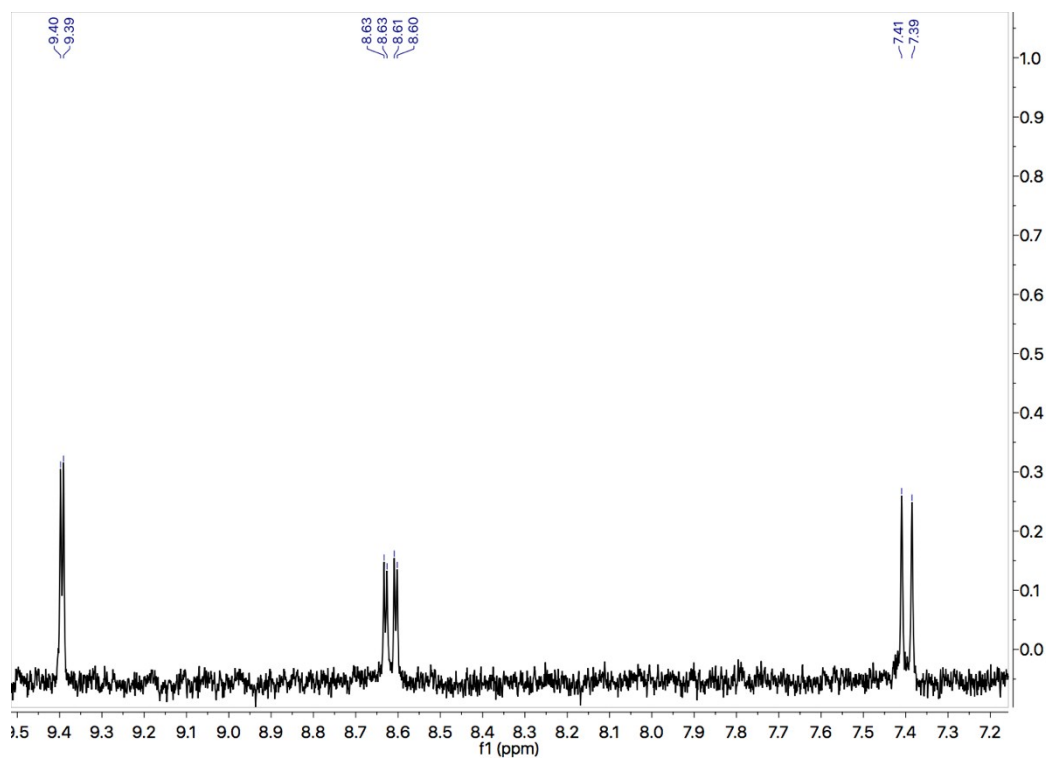

**Figure S11:**  $^1\text{H}$  NMR spectrum of compound **8** formed in the reaction of **1** with L-Cys at very long time, in  $\text{D}_2\text{O}$ - Acetonitrile 60:40 %v/v.

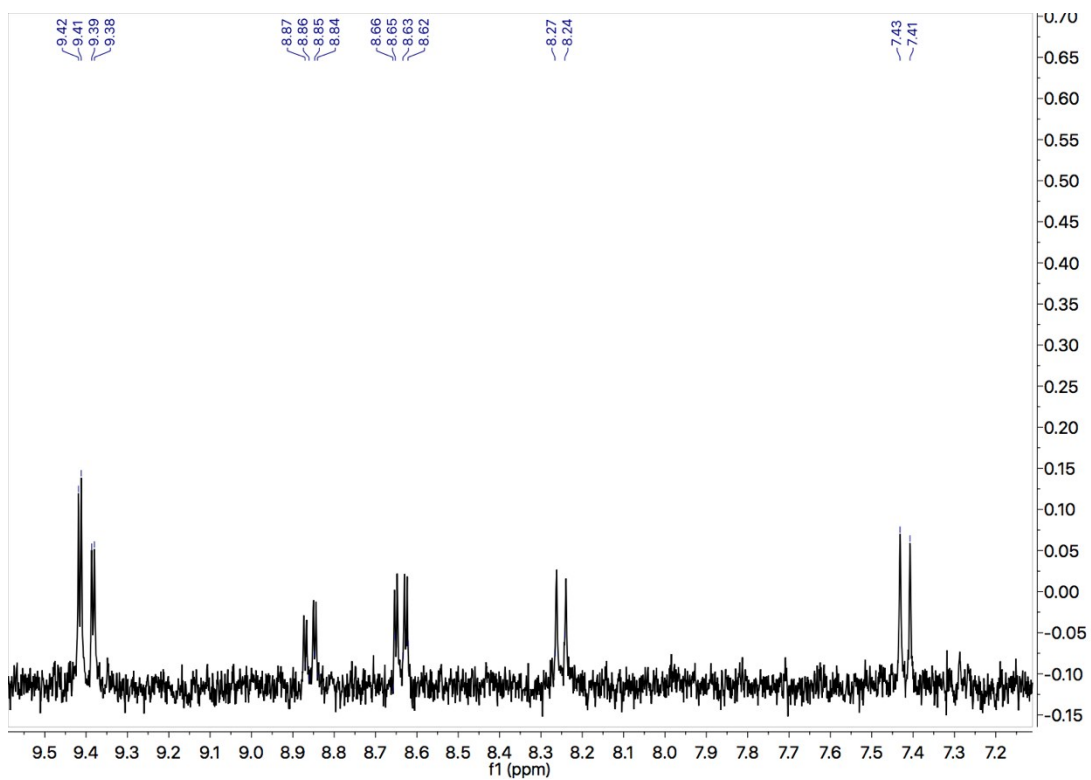

**Figure S12:** <sup>1</sup>H NMR spectrum of the mixture of compounds **7** and **8** formed during the reaction of **1** with L-Cys, in D<sub>2</sub>O- Acetonitrile 60:40 %v/v.

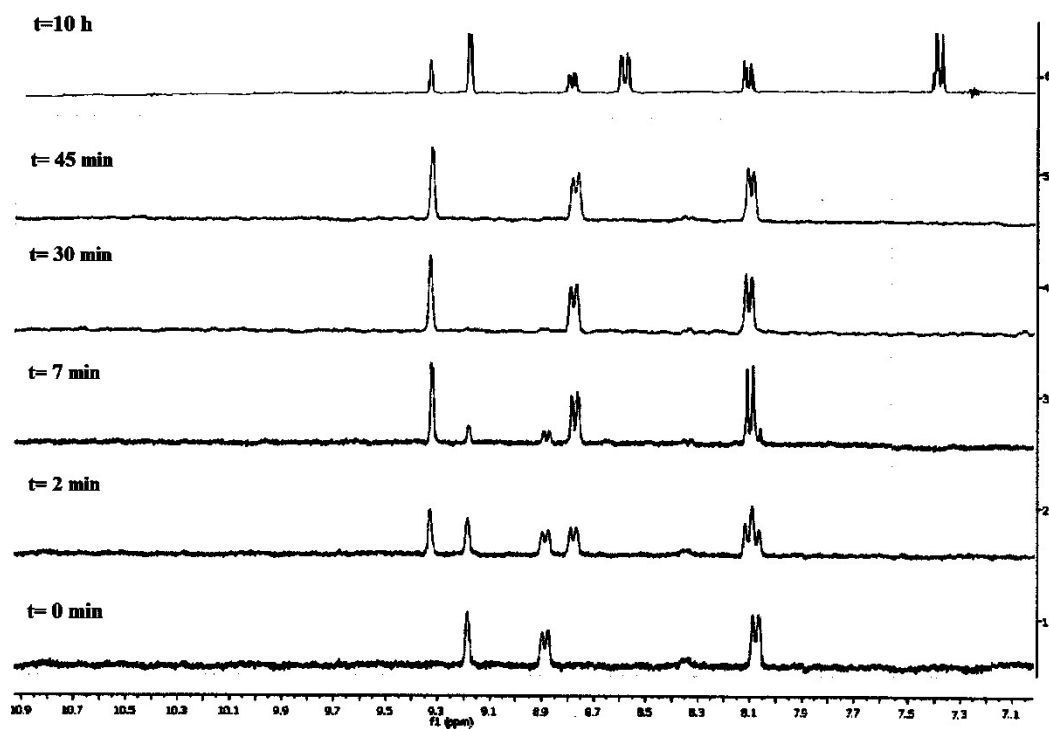

**Figure S13:** Sequence of <sup>1</sup>H NMR spectra for the reaction of *O,O*-diethyl 2,4-dinitrophenyl phosphate (**1**) with Homocysteine in D<sub>2</sub>O- Acetonitrile 60:40 %v/v.



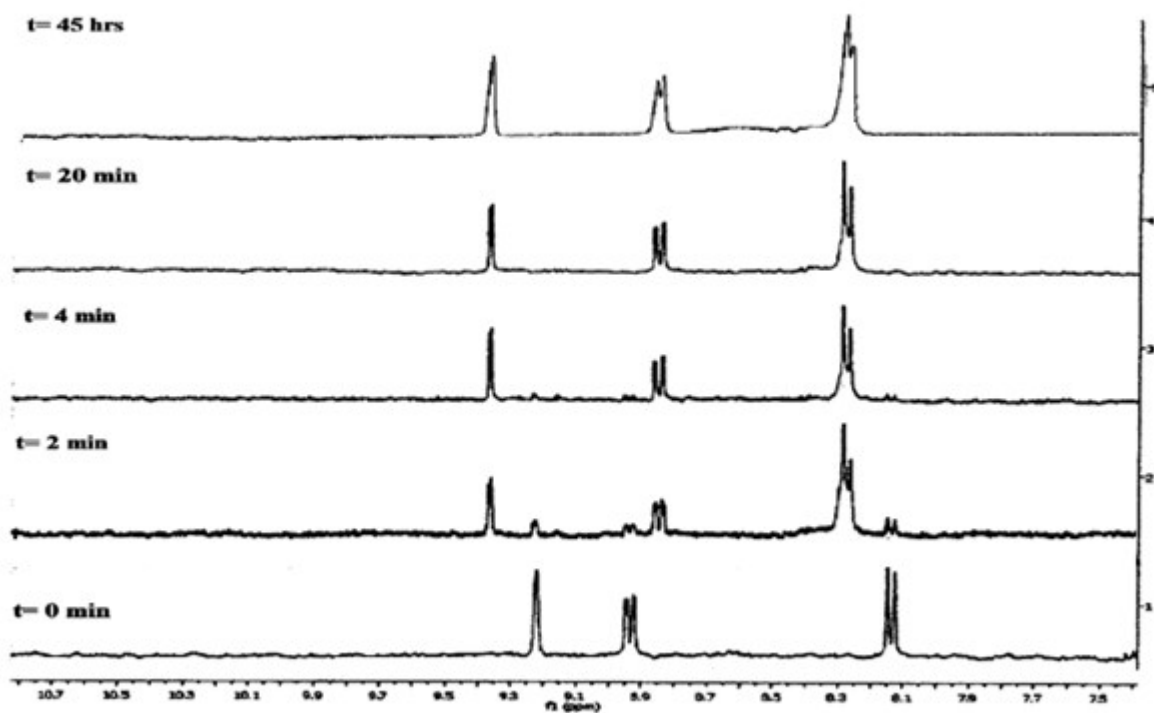

**Figure S14:** Sequence of  $^1\text{H}$  NMR spectra for the reaction of *O,O*-diethyl 2,4-dinitrophenyl phosphate (**1**) with Glutathione in  $\text{D}_2\text{O}$ - Acetonitrile 60:40 %v/v.

**Table S1:** Chemical shifts of 1-Chloro-2,4-dinitrobenzene, 2,4-dinitrophenol, compounds **1** and **2** and those attributed to the compounds **3-8**.

| Compound                                                           | NMR- <sup>1</sup> H δ (ppm)                                                                          | NMR- <sup>31</sup> P δ (ppm) |
|--------------------------------------------------------------------|------------------------------------------------------------------------------------------------------|------------------------------|
| <i>O,O</i> -diethyl 2,4-dinitrophenyl phosphate ( <b>1</b> )       | 8.11 (d, $J_1=9.2$ Hz, 1H), 8.90 (dd, $J_1=9.2$ Hz, $J_2=2.8$ Hz, 1H), 9.19 (d, $J_2=2.8$ Hz, 1H)    | -7.52                        |
| <i>O,O</i> -diethyl 2,4-dinitrophenyl thionophosphate ( <b>2</b> ) | 8.11 (d, $J_1=9.2$ Hz, 1H), 8.90 (dd, $J_1=9.2$ Hz, $J_2=2.8$ Hz, 1H), 9.17 (d, $J_2=2.8$ Hz, 1H)    | 62.2                         |
| <i>O,O</i> -diethylphosphoric acid ( <b>3</b> )                    |                                                                                                      | 0.81                         |
| <i>O,O</i> -diethylthiophosphoric acid ( <b>4</b> )                |                                                                                                      | 55.3                         |
| 1-( <i>S</i> -acetylcysteine) 2,4-dinitrobenzene ( <b>5</b> )      | 8.25 (d, $J_1=8.8$ Hz, 1H), 8.81 (dd, $J_1=8.8$ Hz, $J_2=2.1$ Hz, 1H), 9.34 (d, $J_2=2.1$ Hz, 1H).   |                              |
| 1-( <i>N</i> -penicillamine) 2,4-dinitrobenzene ( <b>6</b> )       | 7.48 (d, $J_1=9.6$ Hz, 1H), 8.65 (dd, $J_1=9.6$ Hz, $J_2=2.7$ Hz, 1H), 9.40 (d, $J_2=2.7$ Hz, 1H).   |                              |
| 1-( <i>S</i> -cysteil) 2,4-dinitrobenzene ( <b>7</b> )             | 8.25 (d, $J_1=9.1$ Hz, 1H), 8.80 (dd, $J_1=9.1$ Hz, $J_2=2.5$ Hz, 1H), 9.31 (d, $J_2=2.5$ Hz, 1H).   |                              |
| 1-( <i>N</i> -cysteil) 2,4-dinitrobenzene ( <b>8</b> )             | 7.4 (d, $J_1=9.7$ Hz, 1H), 8.63 (dd, $J_1=9.7$ Hz, $J_2=2.4$ Hz, 1H), 9.40 (d, $J_2=2.4$ Hz, 1H).    |                              |
| 2,4-dinitrophenol                                                  | 7.01 (d, $J_1=9.6$ Hz, 1H-Ar), 8.35 (dd, $J_1=9.6$ Hz, $J_2=3.2$ Hz, 1H), 9.08 (d, $J_2=2.8$ Hz, 1H) |                              |
| 1-chloro-2,4-dinitrobenzene                                        | 8.34 (d, $J_1=8.8$ Hz, 1H), 8.83 (dd, $J_1=8.8$ Hz, $J_2=2.8$ Hz, 1H), 9.16 (d, $J_2=2.4$ Hz, 1H)    |                              |

**Table S2:** Kinetics data for the **1** and **2** reactions with Cys 0.05M,  $\mu = 0.2$  M(KCl) at  $25 \pm 0.1^\circ\text{C}$ .

| pH    | $10^4 k_{\text{obs}}/\text{s}^{-1}$ |          |
|-------|-------------------------------------|----------|
|       | <b>1</b>                            | <b>2</b> |
| 6.01  | 6.50                                | 0.21     |
| 6.55  | 16.9                                | 0.66     |
| 6.94  | 36.3                                | 2.00     |
| 7.49  | 110                                 | 4.86     |
| 7.98  | 295                                 | 12.6     |
| 8.52  | 565                                 | 17.1     |
| 9.07  | 773                                 | 22.5     |
| 10.07 | 1000                                | 25.1     |
| 10.56 | 1050                                | -        |

**Table S3:** Experimental conditions and  $k_{\text{obs}}$  values for the reactions *O,O*-diethyl 2,4-dinitrophenyl phosphate (**1**) with N-acetylcysteine (NAC) in aqueous ethanol 44wt. % , 37.0 °C,  $\mu = 0.2$  M in KCl.

| [NAC] <sub>T</sub> /M | $10^3 k_{\text{obs}} / \text{s}^{-1}$         |                                               |                                               |
|-----------------------|-----------------------------------------------|-----------------------------------------------|-----------------------------------------------|
|                       | pH: 7.0<br>$F_{\text{N}(\text{S}^-)}: 0.0032$ | pH: 7.5<br>$F_{\text{N}(\text{S}^-)}: 0.0099$ | pH: 8.0<br>$F_{\text{N}(\text{S}^-)}: 0.0307$ |
| 0.10                  | 7.18                                          | 20.1                                          | 56.7                                          |
| 0.08                  | 6.14                                          | 16.2                                          | 45.2                                          |
| 0.06                  | 5.10                                          | 13.3                                          | 33.5                                          |
| 0.04                  | 3.16                                          | 8.15                                          | 22.7                                          |
| 0.02                  | 1.69                                          | 4.99                                          | 11.3                                          |
| 0.01                  | 8.16                                          | 2.06                                          | 5.48                                          |

**Table S4:** Experimental conditions and  $k_{\text{obs}}$  values for the reactions *O,O*-diethyl 2,4-dinitrophenyl phosphate (**1**) with L-Cysteine (Cys) in aqueous ethanol 44wt. % , 37.0 °C,  $\mu = 0.2$  M in KCl.

| [L-Cys] <sub>T</sub> /M | $10^2 k_{\text{obs}} / \text{s}^{-1}$         |                                               |                                   |
|-------------------------|-----------------------------------------------|-----------------------------------------------|-----------------------------------|
|                         | pH: 7.0<br>$F_{\text{N}(\text{S}^-)}: 0.0736$ | pH: 7.5<br>$F_{\text{N}(\text{S}^-)}: 0.2008$ | pH: 8.0<br>$F_{\text{N}}: 0.4427$ |
| 0.10                    | 2.04                                          | 4.21                                          | 10.5                              |
| 0.08                    | 1.56                                          | 3.82                                          | 7.62                              |
| 0.06                    | 1.15                                          | 2.64                                          | 5.71                              |
| 0.04                    | 0.824                                         | 2.55                                          | 4.72                              |
| 0.02                    | 0.783                                         | 1.28                                          | 2.88                              |
| 0.01                    | 0.237                                         | 0.600                                         | 1.55                              |

**Table S5:** Experimental conditions and  $k_{\text{obs}}$  values for the reactions *O,O*-diethyl 2,4-dinitrophenyl phosphate (**1**) with Homocysteine (Hcys) in aqueous ethanol 44wt. % , 37.0 °C,  $\mu = 0.2$  M in KCl.

| [H-Cys] <sub>T</sub> /M | $10^3 k_{\text{obs}} / \text{s}^{-1}$ |                                       |                                       |
|-------------------------|---------------------------------------|---------------------------------------|---------------------------------------|
|                         | pH: 7.0<br>$F_{\text{N(S-)}}: 0.0532$ | pH: 7.5<br>$F_{\text{N(S-)}}: 0.1510$ | pH: 8.0<br>$F_{\text{N(S-)}}: 0.3599$ |
| 0.01                    | 1.16                                  | 2.32                                  | 4.81                                  |
| 0.008                   | 0.903                                 | 1.92                                  | 3.91                                  |
| 0.006                   | 0.740                                 | 1.55                                  | 3.05                                  |
| 0.004                   | 0.535                                 | 1.13                                  | 2.10                                  |
| 0.002                   | 0.421                                 | 0.789                                 | 1.28                                  |
| 0.001                   | 0.344                                 | 0.530                                 | 0.874                                 |

**Table S6:** Experimental conditions and  $k_{\text{obs}}$  values for the reactions *O,O*-diethyl 2,4-dinitrophenyl phosphate (**1**) with Glutathione (GSH) in aqueous ethanol 44wt. % , 37.0 °C,  $\mu = 0.2$  M in KCl.

| [GSH] <sub>T</sub> /M | $10^3 k_{\text{obs}} / \text{s}^{-1}$ |                                       |                                       |
|-----------------------|---------------------------------------|---------------------------------------|---------------------------------------|
|                       | pH: 7.0<br>$F_{\text{N(S-)}}: 0.0187$ | pH: 7.5<br>$F_{\text{N(S-)}}: 0.0568$ | pH: 8.0<br>$F_{\text{N(S-)}}: 0.1600$ |
| 0.12                  | 10.7                                  |                                       |                                       |
| 0.08                  | 4.30                                  |                                       |                                       |
| 0.06                  | 4.10                                  |                                       |                                       |
| 0.05                  |                                       | 14.0                                  |                                       |
| 0.04                  | 3.41                                  | 12.6                                  |                                       |
| 0.03                  |                                       | 10.1                                  | 22.3                                  |
| 0.02                  | 1.90                                  | 7.08                                  | 16.3                                  |
| 0.01                  | 0.961                                 | 4.73                                  | 10.2                                  |
| 0.005                 |                                       | 2.41                                  | 3.52                                  |

**Table S7:** Experimental conditions and  $k_{\text{obs}}$  values for the reactions *O,O*-diethyl 2,4-dinitrophenyl phosphate (**1**) with D-Penicillamine (Pen) in aqueous ethanol 44wt. % , 37.0 °C,  $\mu = 0.2$  M in KCl.

|                       | $10^4 k_{\text{obs}} / \text{s}^{-1}$          |
|-----------------------|------------------------------------------------|
| [Pen] <sub>T</sub> /M | pH: 10.0<br>$F_{\text{N}(\text{NH}_2)}$ : 0.24 |
| 0.01                  | 15.7                                           |
| 0.008                 | 13.4                                           |
| 0.006                 | 9.64                                           |
| 0.004                 | 6.22                                           |
| 0.002                 | 3.62                                           |
| 0.001                 | 2.25                                           |

**Table S8:** Experimental conditions and  $k_{\text{obs}}$  values for the reactions *O,O*-diethyl 2,4-dinitrophenyl thionohosphate (**2**) with L-Cysteine (Cys) in aqueous ethanol 44wt. % , 37.0 °C,  $\mu = 0.2$  M in KCl.

|                                           | $10^5 k_{\text{obs}} / \text{s}^{-1}$ |                                   |
|-------------------------------------------|---------------------------------------|-----------------------------------|
| $10^3 [\text{Cys}]_{\text{T}} / \text{M}$ | pH: 6.9<br>$F_{\text{N}}$ : 0.059     | pH: 7.4<br>$F_{\text{N}}$ : 0.167 |
| 15                                        | 57.7                                  | 107                               |
| 10                                        | 45.5                                  | 86.0                              |
| 8.0                                       | 49.6                                  | 75.5                              |
| 6.0                                       | 31.5                                  | 55.4                              |
| 4.0                                       |                                       | 47.3                              |
| 2.5                                       |                                       | 35.0                              |

**Table S9:** Experimental conditions and  $k_{\text{obs}}$  values for the reactions *O,O*-diethyl 2,4-dinitrophenyl thionohosphate (**2**) with Glutathione (GSH) in aqueous ethanol 44wt. % , 37.0 °C,  $\mu = 0.2$  M in KCl.

| $10^3 [\text{GSH}]_{\text{T}}/\text{M}$ | $10^4 k_{\text{obs}}/\text{s}^{-1}$ |                                  |
|-----------------------------------------|-------------------------------------|----------------------------------|
|                                         | pH: 6.9<br>$F_{\text{N}}: 0.015$    | pH: 7.4<br>$F_{\text{N}}: 0.046$ |
| 15                                      | 9.86                                | 23.9                             |
| 10                                      | 6.95                                | 17.5                             |
| 8.0                                     | 5.93                                |                                  |
| 6.0                                     | 4.58                                | 11.8                             |
| 4.0                                     | 2.67                                | 8.13                             |
| 2.5                                     | 1.60                                |                                  |
| 1.0                                     | 0.673                               | 1.66                             |

**Table S10:** Experimental conditions and  $k_{\text{obs}}$  values for the reactions *O,O*-diethyl 2,4-dinitrophenyl thionohosphate (**2**) with Homocysteine (Hcys) in aqueous ethanol 44wt. % , 37.0 °C,  $\mu = 0.2$  M in KCl.

| $10^3 [\text{Hcys}]_{\text{T}}/\text{M}$ | $10^4 k_{\text{obs}}/\text{s}^{-1}$ |                                  |
|------------------------------------------|-------------------------------------|----------------------------------|
|                                          | pH: 6.9<br>$F_{\text{N}}: 0.043$    | pH: 7.4<br>$F_{\text{N}}: 0.124$ |
| 15                                       | 6.13                                | 14.5                             |
| 10                                       | 4.31                                | 9.92                             |
| 8.0                                      | 3.24                                | 8.19                             |
| 6.0                                      | 2.73                                | 6.48                             |
| 4.0                                      | 1.81                                | 4.27                             |
| 2.5                                      |                                     | 2.66                             |
| 1.0                                      | 1.28                                | 1.87                             |

**Table S11:** Experimental conditions and  $k_{\text{obs}}$  values for the reactions *O,O*-diethyl 2,4-dinitrophenyl thionohosphate (**2**) with N-acetylcysteine (NAC) in aqueous ethanol 44wt. %. 37.0 °C.  $\mu = 0.2$  M in KCl.

| $10^3 [\text{NAC}]_{\text{T}}/\text{M}$ | $10^5 k_{\text{obs}}/\text{s}^{-1}$ |                                   |
|-----------------------------------------|-------------------------------------|-----------------------------------|
|                                         | pH: 6.9<br>$F_{\text{N}}: 0.0025$   | pH: 7.4<br>$F_{\text{N}}: 0.0099$ |
| 15                                      | 40.4                                | 138                               |
| 10                                      | 31.4                                | 80.3                              |
| 8.0                                     | 24.7                                | 69.2                              |
| 6.0                                     | 20.5                                | 54.1                              |
| 4.0                                     | 11.0                                | 32.9                              |
| 2.5                                     | 6.56                                | 20.5                              |
| 1.0                                     | 1.76                                | 8.02                              |

**Table S12:** Experimental conditions and zero-order  $k_{\text{obs}}$  values for the rearrangement reaction of **7** in aqueous ethanol 44wt. % , 37.0 °C,  $\mu = 0.2$  M in KCl

| [Cys]/M | $10^5 k_{\text{obs}}/\text{mol s}^{-1}$ |           |           |           |
|---------|-----------------------------------------|-----------|-----------|-----------|
|         | pH=7.5                                  | pH=8.0    | pH=8.5    | pH=9.0    |
| 0.1     |                                         | 1.54      |           | 1.35-2.1  |
| 0.16    | 1.3-2.1                                 | 1.67-1.78 | 1.67      | 1.75-1.79 |
| 0.22    | 1.3-1.6                                 | 1.94      |           | 1.32      |
| 0.28    | 1.4                                     | 1.38      | 1.0-2.08  | 1.02-1.19 |
| 0.34    | 1.1                                     | 1.57      | 1.16      | 1.03-1.71 |
| 0.40    | 1.7                                     | 1.36-1.75 | 1.36-1.48 | 1.86      |
| 0.5     |                                         | 1.08      | 1.06      | 1.88      |
| 0.6     | 1.1-2.1                                 | 1.2-1.41  | 1.20-1.24 |           |
